# Supplementary material for: Photomechanical photochromism in a cetyltrimethylammonium isopolytungstate
Source: Royal Society of Chemistry journal article supplement (doi:10.1039/c8ra03731k), 2018-01-01
Supplement: c8ra03731k1.pdf [file c8ra03731k1.pdf]

## Electronic Supplementary Information

### Photomechanical Photochromism in a Cetyltrimethylammonium Isopolytungstate

*Aaron Victor Colusso, Andrew McDonagh, Angus Gentle, and Michael Bernard Cortie\**

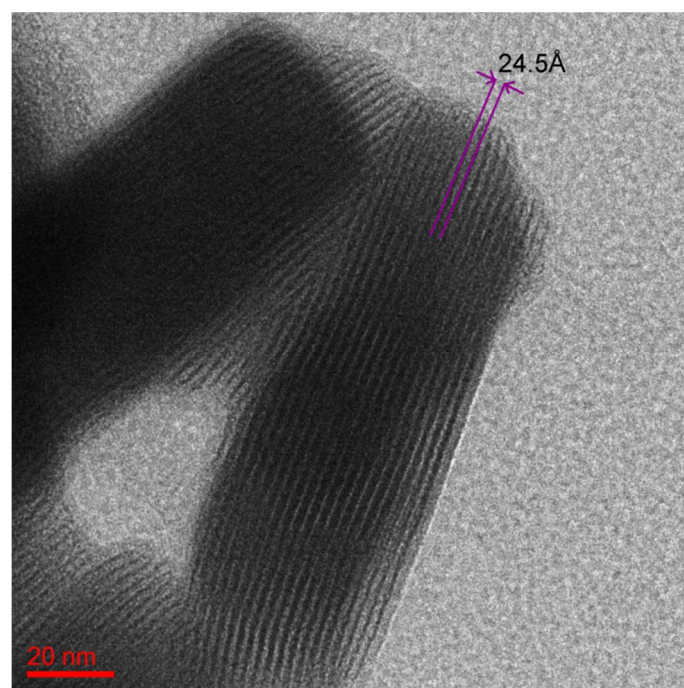

**Fig. S1** TEM image of CTA- $W_{12}$  crystals/particles. Courtesy of Dr A. Dowd, University of Technology Sydney.

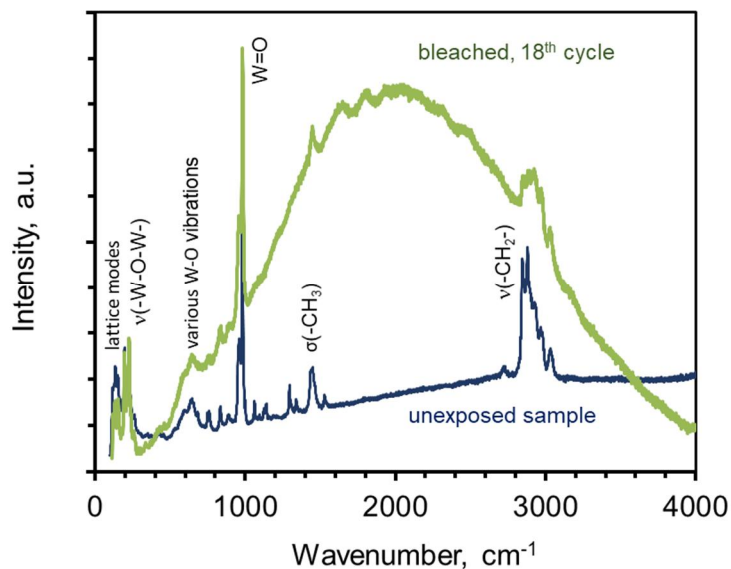

**Fig. S2** Raman spectra of bleached (spectrum collected three days after exposure to UV) and as-prepared CTA-W<sub>12</sub>. The application of repeated cycling generated significant fluorescence in the sample. There is also a marked reduction in CH<sub>2</sub> and CH<sub>3</sub> peak intensity.

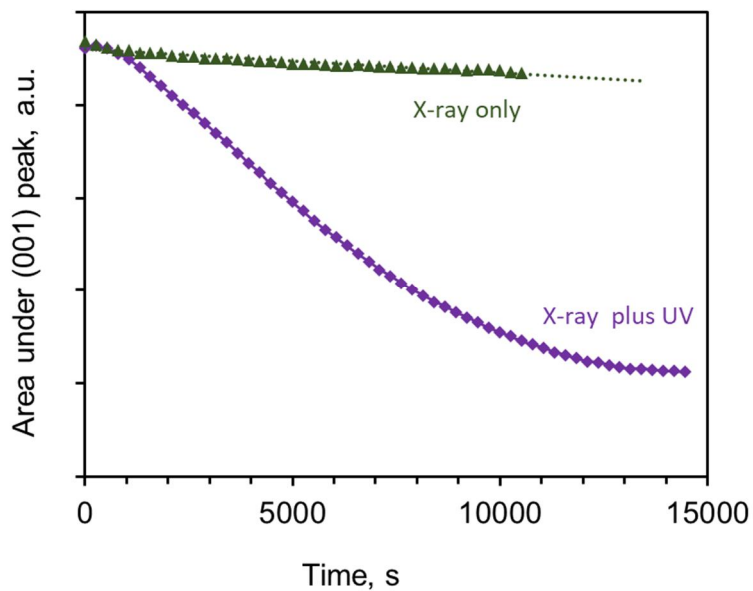

**Fig. S3** Changes in area of (001) peak for case of X-ray irradiation only, compared to case with simultaneous UV illumination. The green dotted line is a linear extrapolation.

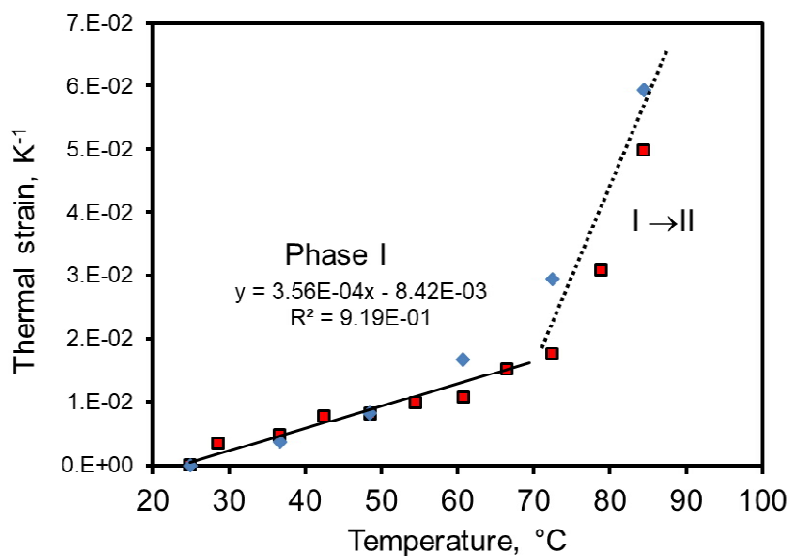

**Fig. S4** Thermal expansion of CTA- $W_{12}$  in [001] direction (normal to layers of Keggin ions). When heated, the compound designated as ‘Phase I’ undergoes a structural transformation at 70°C to form a more loosely packed compound that has been designated as ‘Phase II’. See Colusso et al<sup>[8]</sup> for additional information on these phase transformations

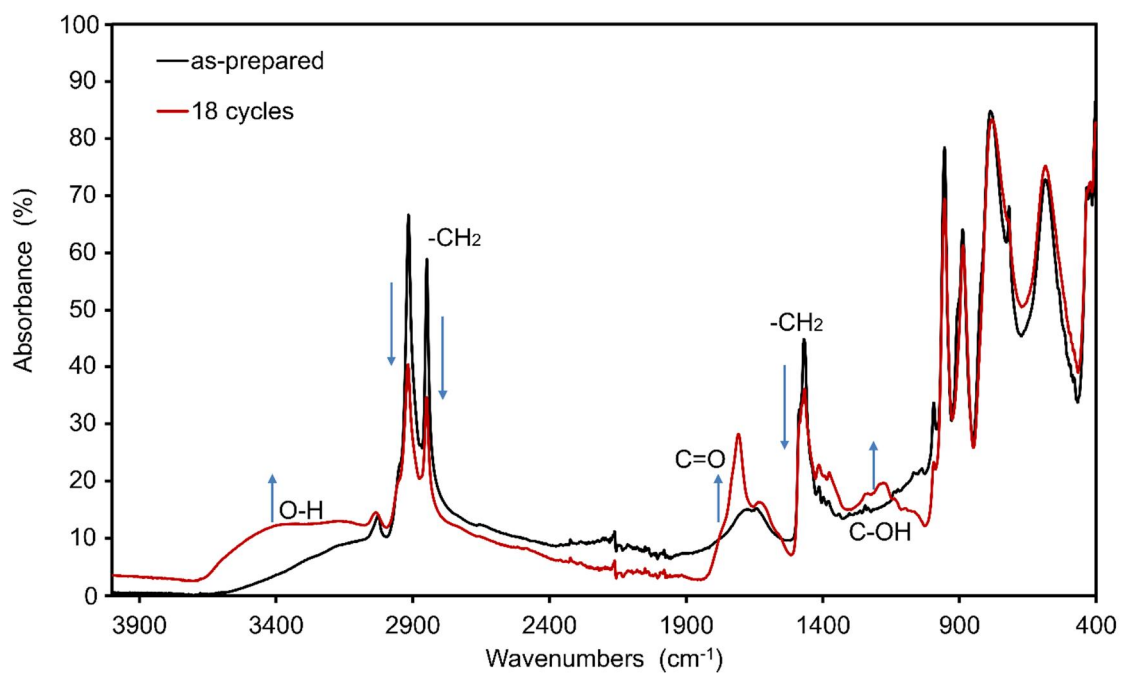

**Fig. S5** FTIR spectra of compound, showing as-synthesized spectrum and spectrum after 18 photochromic cycles.

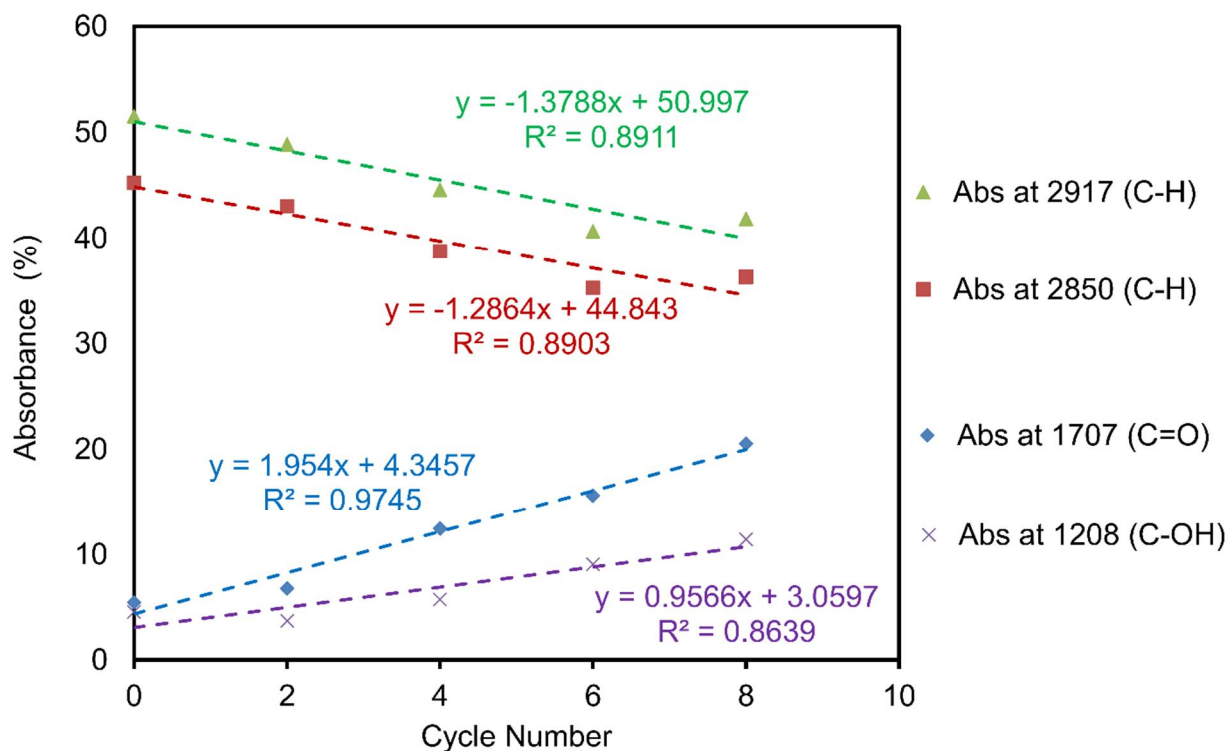

**Fig. S6** Changes to FTIR spectra during first 6 cycles of coloring/bleaching. Decrease in -CH<sub>2</sub> vibrations and increase in oxygenated (C=O, C-OH) species.

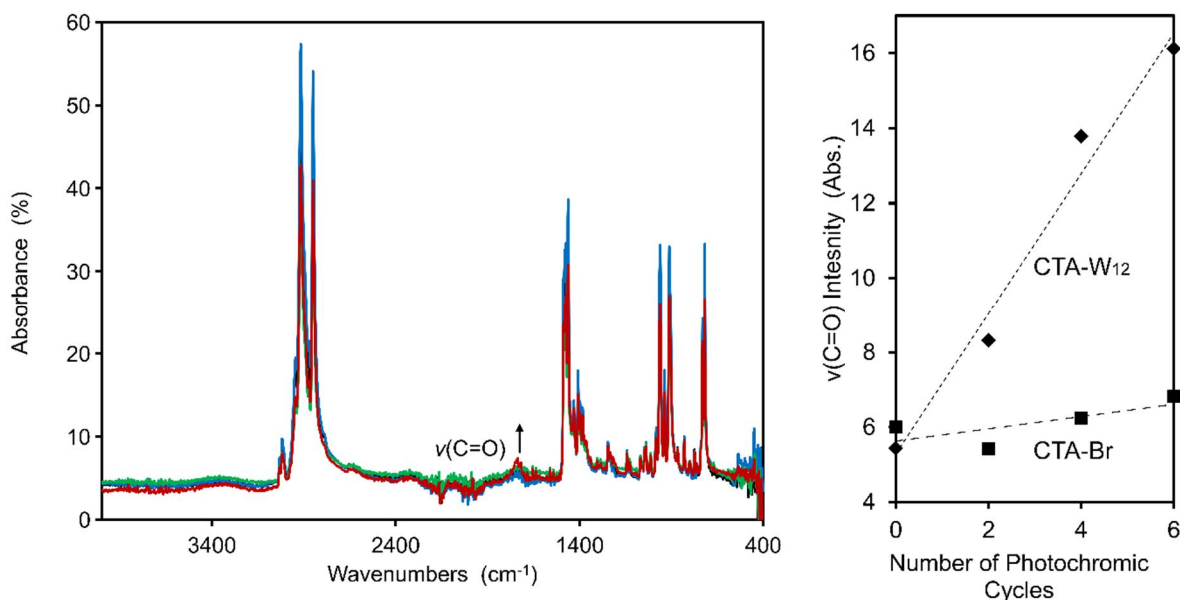

**Fig. S7** (a) FT-IR of CTA-Br as-received (-), and after two (-), four (-) and six (-) periods of 1 hr UV irradiation. (b) Growth of  $\nu(\text{C}=\text{O})$  intensity in CTA-W<sub>12</sub> and CTA-Br due to UV irradiation.

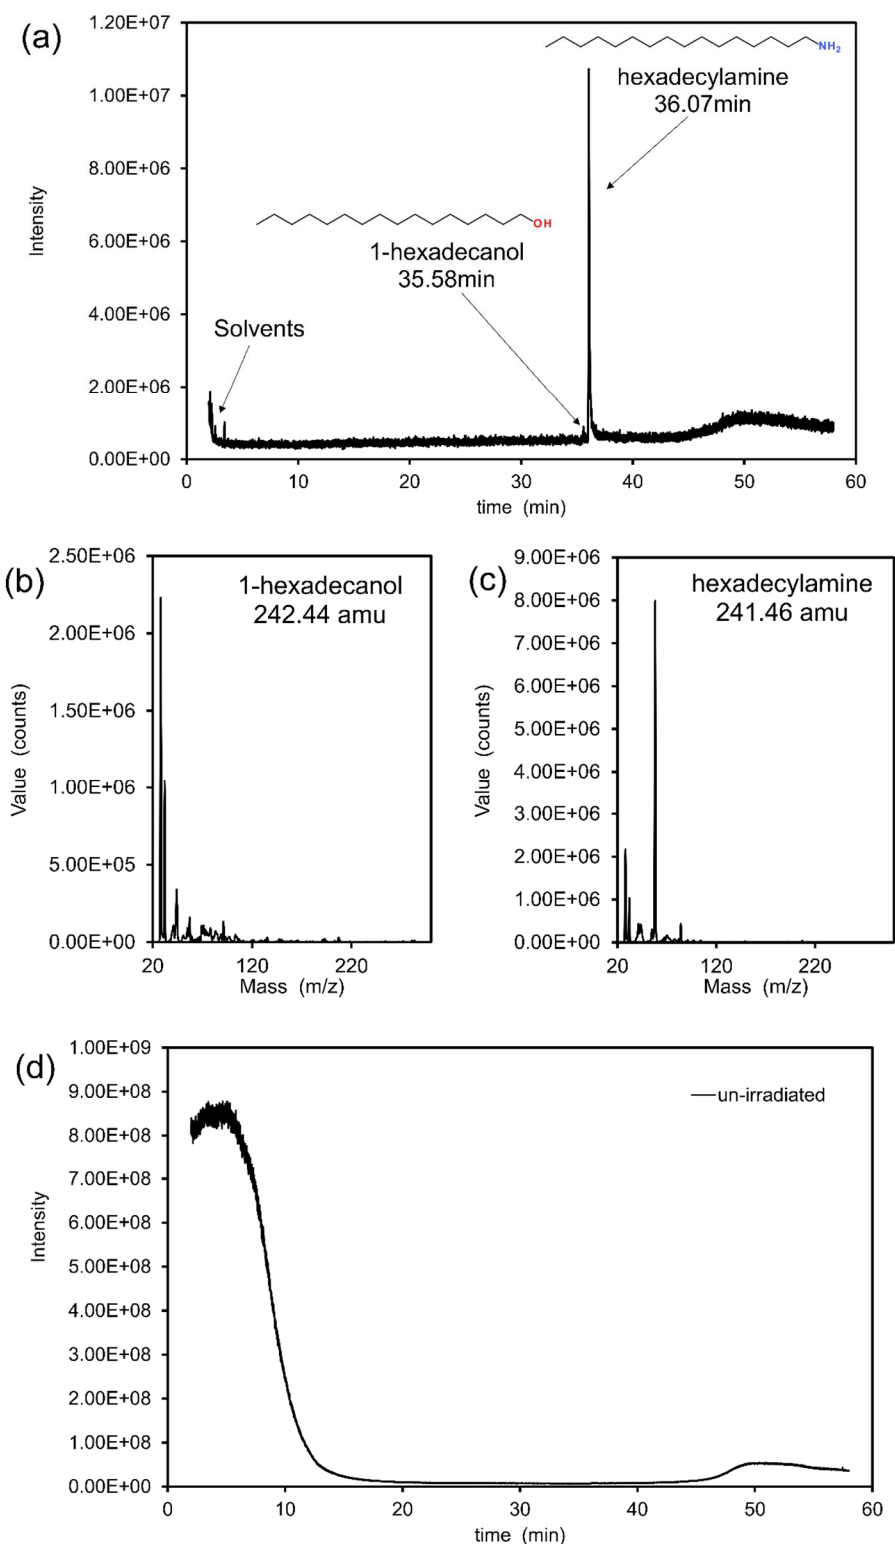

**Fig. S8** (a) GC of CTA-W<sub>12</sub> after 48 hours UV irradiation, extracted in CHCl<sub>3</sub> (a) Mass spectrum of minor product 1-hexadecanol (b) Mass spectrum of major product hexadecylamine (d) GC of unirradiated (as-prepared) CTA-W<sub>12</sub>, extracted in CHCl<sub>3</sub>.
